## Article

# Low-temperature combined with high-humidity thawing improves the water-holding capacity and biochemical properties of *Portunus trituberculatus* protein

Jiangang Ling (凌建刚)<sup>1,2</sup>, Xiaoting Xuan (宣晓婷)<sup>2,✉</sup>, Zihan Xu (徐子涵)<sup>3</sup>, Tian Ding (丁甜)<sup>1</sup>, Xudong Lin (林旭东)<sup>2</sup>, Yan Cui (崔燕)<sup>2,\*</sup> and Donghong Liu (刘东红)<sup>1,\*</sup>

<sup>1</sup>College of Biosystems Engineering and Food Science, National-Local Joint Engineering Laboratory of Intelligent Food Technology and Equipment, Zhejiang University, Hangzhou, China; <sup>2</sup>Institute of Agricultural Products Processing, Key Laboratory of Preservation Engineering of Agricultural Products, Ningbo Academy of Agricultural Sciences, Ningbo, China and <sup>3</sup>College of Food, Shenyang Agricultural University, Shenyang, China

\*Correspondence to: Donghong Liu, Department of Food Science and Nutrition, National Engineering Laboratory of Intelligent Food Technology and Equipment, Zhejiang University, Hangzhou 310058, China. E-mail: [dhliu@zju.edu.cn](mailto:dhliu@zju.edu.cn); Yan Cui, Institute of Agricultural Products Processing, Key Laboratory of Preservation Engineering of Agricultural Products, Ningbo Academy of Agricultural Sciences, Ningbo 315040, China. E-mail: [cuiyan1605@126.com](mailto:cuiyan1605@126.com)

Received 3 December 2020; Revised 21 January 2021; Editorial decision 24 February 2021.

## Abstract

This study compared the effects of conventional thawing methods (water immersion thawing (WIT, (25±1) °C), natural air thawing (AT, (25±1) °C, relative humidity (RH) (65±2) per cent), refrigerator thawing (RT, 4 °C, RH (80±2) per cent) and low-temperature (LT) combined with high-humidity thawing (LT, -1 °C to 1 °C (LT-1-1), 2–4 °C (LT2-4), 5–7 °C (LT5-7) and 8–10 °C (LT8-10), RH≥95 per cent) on the water-holding capacity, lipid oxidation and biochemical properties of *Portunus trituberculatus* (*P. trituberculatus*) myofibrillar protein. The results showed that WIT and AT significantly decreased the water-holding capacity while dramatically increasing lipid oxidation, protein oxidation and degeneration, resulting in serious *P. trituberculatus* quality deterioration. High humidity was beneficial for *P. trituberculatus* thawing. The thawing time of *P. trituberculatus* under the conditions of LT2-4 was only 39.39 per cent of that of conventional air thawing at 4 °C (RT), and the LT2-4 samples not only maintained better water-holding capacity but also had an obviously reduced degree of lipid oxidation, protein oxidation and denaturation. Thawed samples LT2-4 and LT5-7 provided better maintenance of *P. trituberculatus* quality than the LT-1-1 and LT8-10 samples. The best quality was exhibited after thawing at 2–4 °C. The levels of thiobarbituric acid reacting substances, carbonyl content and surface hydrophobicity observably decreased in these samples, while the total sulfhydryl contents dramatically increased compared to those of conventionally thawed samples, indicating lower lipid oxidation and protein oxidation. Moreover, the Ca<sup>2+</sup>-ATPase activity of the sample thawed at 2–4 °C (2.06 μmol Pi/mg prot/h) was markedly higher than that of samples subjected to WIT and AT. The product qualities observed after thawing at -1 °C, 5–7 °C and 8–10 °C under LT were comparable to that observed by RT. Considering its thawing

efficiency and product quality, LT is a suitable method for the thawing of *P. trituberculatus*, and the ideal thawing conditions were LT at 2–4 °C.

**Keywords:** *Portunus trituberculatus*; thawing; low temperature combined with high humidity; water-holding capacity; lipid oxidation; biochemical properties of myofibrillar protein.

## Introduction

Swimming crabs (*Portunus trituberculatus*) are important economical farmed crabs that are widely distributed in the coastal areas of China. Swimming crabs are seasonal and die easily after being caught. Once dead, the protein and fat in their bodies rapidly decompose under the action of enzymes and microorganisms, leading to spoilage and deterioration. Therefore, freezing is the main long-term storage method for the market circulation of these crabs, and thawing is a necessary step before secondary processing or eating. However, an improper thawing method may greatly degrade the quality of these crabs after considering factors such as drip loss, lipid oxidation, protein denaturation, loose muscle tissue, and dark color (Lorentzen et al., 2020). Thus, it is necessary to choose an appropriate thawing method to maximize the freshness of frozen crabs.

Generally, thawing with air, in water and at low temperature (4 °C in a refrigerator) are the traditional methods; however, these methods face the problems of low efficiency and easy microbial contamination (Chandrasekaran and Thulasi, 2013). Therefore, new thawing methods have been used to overcome these problems, such as low-temperature combined with high-humidity thawing (LT) (Li et al., 2014a, 2014b), microwaves (Manios and Skandamis, 2015), ultrahigh pressure (Truong et al., 2015), ohmic heating (Richa et al., 2017), and high-voltage electrostatic fields (Mousakhani-Ganjeh et al., 2016). Among these new thawing methods, the LT method is cost-effective because it requires little equipment, improves the thawing efficiency, and maintains the quality of frozen products (Li et al., 2014a).

The LT method was developed from refrigerator thawing, and the thawing temperature is usually set within the range of 2–8 °C, together with the relative humidity adjusted to above 90 per cent. Currently, this technique has been widely used in the cattle, sheep, chicken and other livestock and poultry product thawing fields to realize industrialization (Zhang et al., 2013; Li et al., 2014a, b; Zhang et al., 2017). Li et al. (2014b) found that, compared with conventional 4 °C air thawing, high humidity can accelerate thawing and form a water film on the meat surface to isolate oxygen, thus slowing the drip loss and protein oxidation of meat during thawing. In recent years, studies have shown that thawing at low temperatures with high humidity also has great advantages in thawing aquatic products such as pomfret (Cui et al., 2018) and eel (Ersoy et al., 2008). The thawing time of pomfret under LT (2–4 °C) is only 2/3 that of conventional 4 °C air thawing. After thawing, pomfret not only maintained good water retention and texture but also had an obviously reduced degree of protein oxidation and denaturation. In addition, Ersoy et al. (2008) indicated that high relative humidity during low-temperature thawing was required to minimize weight loss, and this theory was demonstrated by Li et al. (2014b). However, until now, there have been few reports on LT in the field of aquatic products and the thawing of swimming crabs.

In this paper, the effects of the LT method on the thawing efficiency, drip loss, pH, and total mercapto and carbonyl contents of swimming crabs were examined. This study aims to systematically investigate the effects of LT on the water retention and protein

biochemical characteristics of crab muscle, and provide a theoretical basis for the application of the LT method in aquatic crab products to control quality.

## Materials and Methods

### Materials and reagents

Fresh swimming crabs ((300±20) g average body weight) were purchased from Lulin Aquatic Market in Ningbo, China, and transported alive under an oxygen supply to the laboratory within 30 min in August. After cleaning, the live crabs were painlessly killed using ice water. The water on the surface of the crabs was rapidly drained with a fanner. Then, the crabs were rapidly packed and frozen at –80 °C, and subsequently stored at –18 °C until the subsequent thawing experiment. The Ca<sup>2+</sup>-ATPase kit was purchased from Nanjing Jiancheng Bioengineering Institute (Nanjing, China). All reagents used were of analytical grade and obtained from Aladdin Biochemical Technology Co., Ltd. (Shanghai, China).

### Sample treatment

Fresh silver pomfret samples were set as a blank control (fresh). The 210 frozen swimming crabs were randomly divided into seven groups and subsequently treated by water immersion thawing (WIT, (25±1) °C), natural air thawing (AT, (25±1) °C, relative humidity (RH) (65±2) per cent), refrigerator thawing (RT, 4 °C, RH (80±2) per cent) or LT. WIT was carried out in a (25±1) °C water bath. AT was carried out in a (25±1) °C room. RT was carried out using a refrigerator at 4 °C. LT was carried out at –1 °C to 1 °C (LT–1–1), 2–4 °C (LT2–4), 5–7 °C (LT5–7) and 8–10 °C (LT8–10). The relative humidity in the whole LT experiment was ≥95 per cent. The geometric center temperature of the samples was detected with a temperature sensor, and the standard for complete thawing was when the geometric center temperature reached 0–2 °C. The time required for the geometric center temperature to reach 0–2 °C was considered the thawing time (Thanonkaew et al., 2006).

All treatments were performed in triplicate. After thawing, a portion of the samples were immediately kept in an ice bath. The thawing properties and quality indexes were measured within 2 hours. The remaining samples were frozen and stored at –80 °C for biochemical assays.

### Determination of thawing loss

Thawing loss of the frozen swimming crab was calculated as the difference between the weight of frozen sample ( $M_0$ ) and weight of thawed sample ( $M_1$ ), and expressed as a percentage of  $M_0$  (Xia et al., 2012):

$$\text{thawing drip loss (\%)} = \frac{M_0 - M_1}{M_0} \times 100\%$$

### Determination of cooking loss

Cooking loss was evaluated according to the method reported by Huang et al. (2020). Thirty grams of the crab muscle ( $W_1$ ) was

accurately weighed and placed in a plastic bag and then cooked in an 80 °C water bath for 30 min. After cooling, filter paper was used to absorb the surface moisture, and the crab muscle was weighed again ( $W_2$ ). The cooking loss was expressed as the percent weight difference between the thawed and cooked crab muscle ( $W_1 - W_2$ ) based on the weight of the thawed sample ( $W_1$ ).

#### Determination of water-holding capacity (WHC)

WHC was determined using the centrifugation method according to Liu *et al.* (2020). Muscle samples (approximately 10 g,  $M_M$ ) were accurately weighed and placed into centrifuge tubes with cotton and filter papers at the bottom. After centrifugation at 4500 rpm and 4 °C for 5 min, the samples were removed and reweighed ( $M_N$ ). The WHC was expressed as centrifugal loss, which was calculated using the following equation:

$$\text{WHC (\%)} = \frac{M_M - M_N}{M_M} \times 100\%$$

#### Determination of pH

Minced muscles were homogenized with 9 volumes of precooled physiological saline. After standing for 30 min, the filtrates were immediately used to assay the pH values with a PB-10 pH meter (Sartorius, Gottingen, Germany).

#### Determination of thiobarbituric acid reacting substances (TBARS)

TBARS was determined according to the method described in our previous study (Cui *et al.*, 2018). Briefly, a crab muscle sample (10.0 g) was homogenized with 50 mL of 7.5 per cent trichloroacetic acid (containing 0.1 per cent ethylene diamine tetraacetic acid). After extraction for 30 min, the mixture was filtered. Five milliliters of filtrate was added to 5 mL of 0.02 mol/L thiobarbituric acid solution. The mixture was heated in a boiling water bath for 40 min followed by cooling and centrifugation at 5500 rpm for 25 min. The supernatant was blended with 5 mL of chloroform, and the absorbance of the supernatant was measured at 532 nm and 600 nm by using a 752S spectrophotometer (Shanghai Lengguang Technology Co., Ltd., Shanghai, China). The TBARS value was calculated using the following equation and is expressed as mg of malonaldehyde/kg of muscle sample (mg MDA/kg):

$$\text{TBARS (mg MDA/kg)} = \frac{(A_{532} - A_{600}) \times V \times 10^{-3}}{\varepsilon \times d \times m} \times 72.06 \times 10^3 \times 1000$$

where  $A_{532}$  and  $A_{600}$  are the absorption values at 532 nm and 600 nm, respectively;  $V$  is the total reaction volume (mL);  $\varepsilon$  is the molar extinction coefficient of MDA, 155 000 L/(mol·cm);  $d$  is the optical path, 1 cm; and  $m$  is the amount of sample participating in the reaction (g).

#### Myofibrillar protein preparation

Myofibrillar protein was prepared from crab muscle according to the method described by Xiong *et al.* (2009) and Lin *et al.* (2015). The whole preparation process was carried out at 4 °C. The obtained myofibrillar protein solution was aliquoted and stored at -80 °C before analysis. The protein concentration was determined by the Biuret method using bovine serum albumin as the standard.

#### Determination of total sulfhydryl (T-SH) content

The T-SH content in the myofibrillar protein was determined by Ellman's method (Ellman, 1959; Cui *et al.*, 2019). A molar extinction

coefficient of 13 600 L/(mol·cm) was utilized to calculate the T-SH content. The T-SH levels in the myofibrillar protein are expressed as nmol/mg prot.

#### Determination of carbonyl content

The carbonyl content of myofibrillar protein was determined by the 2,4-dinitrophenylhydrazine colorimetric method (Oliver *et al.*, 1987; Zhu *et al.*, 2017). The molar extinction coefficient of 22 000 L/(mol·cm) was used to calculate the carbonyl content, and the results are expressed as nmol/mg prot.

#### Determination of surface hydrophobicity

The surface hydrophobicity of myofibrillar protein was determined by the binding of bromophenol blue to hydrophobic amino acid residues on the protein surface (Chelh *et al.*, 2006; Wang *et al.*, 2017). A 1 mL aliquot of myofibrillar protein samples was reacted with 200  $\mu$ L of 1 mg/mL bromophenol blue solution for 10 min at room temperature. After centrifugation at 10 000 rpm for 15 min, the supernatant was diluted 10-fold, and the absorbance at 595 nm was measured. Tris-maleate (0.6 mol/L KCl-20 mmol/L, pH 7.0) was used as a blank sample. The surface hydrophobicity value was expressed by the amount of bromophenol blue bound to each milligram of protein ( $\mu$ g/mg prot). The calculation formula was as follows:

$$\text{Surface hydrophobicity (\mu g/mg prot)} = \frac{A_0 - A_1}{A_0 \times C}$$

where  $A_0$  and  $A_1$  are the absorbance values at 595 nm of the blank sample and the sample, respectively, and  $C$  is the protein concentration (mg/mL) of the sample.

#### Determination of Ca<sup>2+</sup>-ATPase activity

Samples were homogenized with 9 volumes of precooled physiological saline. After centrifugation at 2500 rpm for 10 min, the supernatants were diluted and immediately used for Ca<sup>2+</sup>-ATPase activity measurement. The Ca<sup>2+</sup>-ATPase activity determination was carried out according to the protocol of the corresponding kit, and the results are expressed as the amount of inorganic phosphorus released by the ATPase decomposing ATP per milligram of protein per hour ( $\mu$ mol Pi/mg prot/h).

#### Statistical analysis

All measurements were performed in triplicate and the data were expressed as means  $\pm$  standard deviations. The data were compared and analyzed by one-way analysis of variance and Duncan's test with SPSS 18.0, and the correlation between each index was analyzed at the same time. Differences were considered significant at the level of  $P < 0.05$ .

## Results and Analysis

### Effects of the thawing method on thawing time

The thawing times of the swimming crabs under different thawing conditions are shown in Figure 1A. High humidity contributed favorably to the thawing of the swimming crabs, and the thawing time under high humidity was much shorter than that under traditional air thawing, including the RT and AT groups. In the LT-1-1, LT2-4, LT5-7 and LT8-10 groups, the thawing time were 54.01 per cent, 63.61 per cent, 76.21 per cent and 83.06 per cent lower than that of the RT group (4 °C, RH (80 $\pm$ 2) per cent) and

5.49 per cent, 25.21 per cent, 51.11 per cent and 65.18 per cent lower than that of the AT group ( $25 \pm 1$  °C, RH  $65 \pm 2$  per cent), respectively. Under high-humidity conditions, water vapor condensed to release a large amount of latent heat and attached to the surface of the crab body to form a water film. Further, as water has a higher thermal conductivity than air, the accelerated heat transfer led to accelerated melting of the ice crystals so that the thawing time of the crabs was shortened in the LT groups (Peng et al., 2019). Zhu et al. (2019) found that high humidity (RH 90 per cent) can significantly shorten the thawing time of pork, which was only 9 h at 4 °C (47.06 per cent shorter than that of refrigerator thawing at 4 °C and a RH of 65–73 per cent). Some studies have found that high humidity can also increase the thawing rate of beef (Di and Jin, 2015) and butterfish (Cui et al., 2018), which is consistent with the results of this experiment.

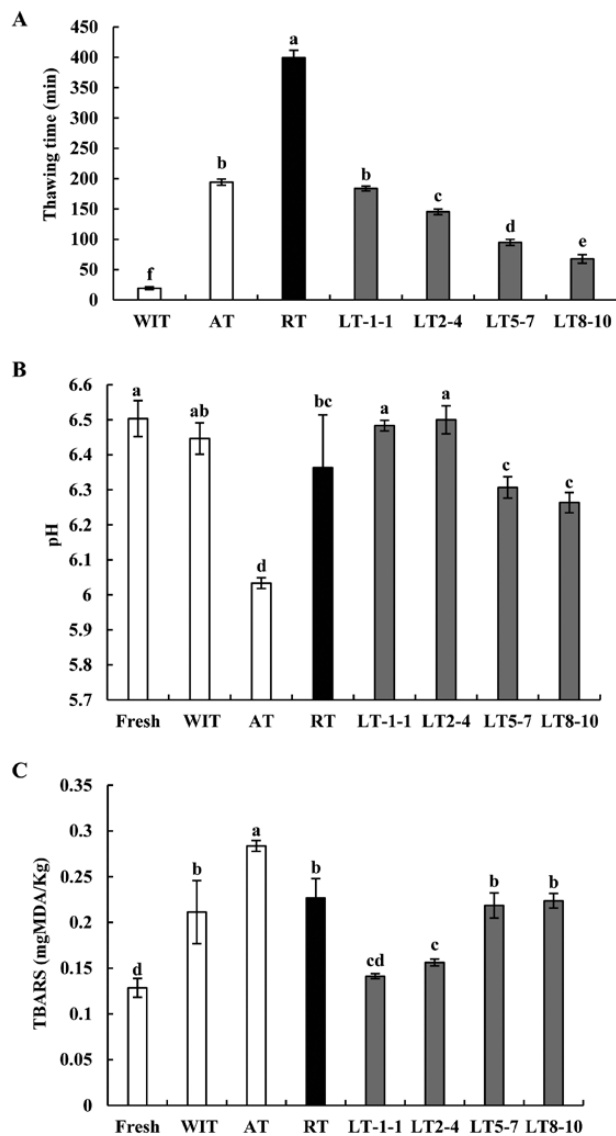

**Figure 1.** Effects of thawing methods on the thawing time (A), pH (B) and lipid oxidation (C) of *Portunus trituberculatus*. Values followed by different Superscripts indicate significant differences ( $P < 0.05$ ). AT, air thawing; LT, low-temperature combined with high-humidity thawing; RT, refrigerator thawing; TBARS, thiobarbituric acid reacting substances; WIT, represents water immersion thawing.

## Effects of the thawing method on water retention of swimming crab muscle

Drip loss is an important indicator of muscle water retention, which directly affects the quality, weight and sensory properties of the product. To explore the effects of low-temperature high-humidity thawing on the water retention in swimming crab muscle, the drip loss after thawing, cooking and centrifugation was determined. As shown in Table 1, there were significant differences in thawing loss among the different thawing methods. The thawing loss of the LT2–4 group was the lowest (3.38 per cent) and was significantly lower than that of the WIT and AT methods ( $P < 0.05$ ), but not significantly different from that of RT. Compared with WIT and AT, the thawing loss in the LT–1–1 and LT5–7 groups decreased significantly ( $P < 0.05$ ), indicating that low-temperature high-humidity thawing is beneficial to reduce the nutritional loss of swimming crabs during thawing. From the point of view of cooking loss, the freezing–thawing process led to an accelerated drip loss in swimming crab muscle during cooking, and the cooking loss of each group increased to varying degrees, among which the lowest cooking loss of 27.55 per cent was found in the LT2–4 group. Compared with that of fresh swimming crabs, the cooking loss after low-temperature high-humidity thawing (LT–1–1, LT2–4 and LT5–7) showed no significant change but significantly decreased by 11.72–18.05 per cent ( $P < 0.05$ ) when compared with that of WIT, indicating that the low-temperature and high-humidity environment can reduce the nutritional loss in the cooking process of thawed swimming crabs. After thawing, the centrifugal loss from swimming crabs showed an upward trend, in which the centrifugal loss of the LT5–7 group was the lowest (12.26 per cent), followed by the LT2–4 group, which was significantly lower than that of the three traditional thawing methods (WIT, RT and AT); additionally, no significant change was recorded when compared with the fresh sample ( $P > 0.05$ ). This finding may be closely related to the lower thawing temperature and shorter thawing time.

According to the comprehensive analysis, thawing at a low temperature (2–7 °C) and high humidity (LT2–4 and LT5–7) can effectively maintain the water-holding capacity of swimming crabs, which is similar to the results found in the study of thawing of butterfish and pork at low temperature combined with high humidity (Cui et al., 2018; Zhu et al., 2019). In fact, glycolysis and protein oxidation during thawing can cause the destruction of the myofibrillar network structure, resulting in drip loss from muscle (Xia et al., 2010). Therefore, the low thawing temperature in the LT method helped to inhibit the activities of these related enzymes and slow glycolysis. In addition, the LT method can shorten the thawing time and form a water film; to isolate oxygen and effectively protect the protein hydration surface, slow down the degree of muscle contraction, and prevent the evaporation of water on the surface and dry consumption (Cui et al., 2018). As a result, the drip loss of thawed juices was reduced after LT treatment on swimming crabs.

## Effects of the thawing method on pH values of swimming crab

After thawing, the change in pH of the swimming crabs in each treatment group is shown in Figure 1B. The pH of the fresh swimming crabs was 6.50, which is weakly acidic. After quick freezing–thawing, the pH of the swimming crabs decreased to varying degrees, which was due to glycolysis of the muscle after the death of the swimming crabs. Additionally, substances such as ATP and creatine phosphate decomposed to produce acidic substances such as phosphoric acid, resulting in a decrease in the pH value (Ryu et al., 2005). Moreover,

**Table 1.** Effects of thawing methods on the thawing drip loss, cooking loss and centrifugal drip loss of *Portunus trituberculatus*

| Thawing treatment | Thawing loss (%)       | Cooking loss (%)         | Centrifugal loss (%)    |
|-------------------|------------------------|--------------------------|-------------------------|
| Fresh             | —                      | 27.51±1.13 <sup>a</sup>  | 12.26±0.36 <sup>a</sup> |
| WIT (25 °C)       | 6.32±0.37 <sup>c</sup> | 33.62±0.53 <sup>c</sup>  | 25.53±0.83 <sup>d</sup> |
| AT (25 °C)        | 8.67±0.50 <sup>d</sup> | 30.13±1.75 <sup>b</sup>  | 25.96±1.27 <sup>d</sup> |
| RT (4 °C)         | 3.53±0.53 <sup>a</sup> | 28.07±1.43 <sup>ab</sup> | 21.69±0.75 <sup>c</sup> |
| LT-1-1 (-1-1 °C)  | 4.50±0.36 <sup>b</sup> | 29.56±0.91 <sup>ab</sup> | 22.80±1.67 <sup>c</sup> |
| LT2-4 (2-4 °C)    | 3.38±0.64 <sup>a</sup> | 27.55±1.98 <sup>a</sup>  | 13.91±0.92 <sup>a</sup> |
| LT5-7 (5-7 °C)    | 3.55±0.64 <sup>a</sup> | 29.68±0.61 <sup>ab</sup> | 12.26±0.84 <sup>a</sup> |
| LT8-10 (8-10 °C)  | 6.03±0.48 <sup>c</sup> | 30.22±0.74 <sup>b</sup>  | 19.18±0.69 <sup>b</sup> |

WIT, represents water immersion thawing; AT, air thawing; RT, refrigerator thawing; LT, low-temperature combined with high-humidity thawing. Values followed by different Superscripts in the same column indicate significant differences ( $P<0.05$ ).

the change in pH value can cause an electrostatic charge effect between protein molecules, which is related to the water retention of the crabs (Zhu *et al.*, 2019). As reported, some minerals and small protein compounds would be exuded along with thawing drip loss during the freezing–thawing process, thus changing the ionic balance in the crab muscle, which is probably another reason for the reduced pH value (Leygonie *et al.*, 2012). It can be seen in the figure that the pH value of the natural air thawing group decreased the most, and the pH in this group was significantly lower than that of the other treatment groups. After thawing at a low temperature in the range of -1 °C to 4 °C under high humidity, the pH value of the swimming crabs decreased slightly, but there was no significant change compared with that of the fresh value ( $P>0.05$ ). The results showed that compared with traditional thawing methods (WIT, RT and AT), low-temperature high-humidity thawing (-1 °C to 4°C) could better maintain the freshness and quality of swimming crabs. It has been reported that compared with traditional thawing, high humidity can significantly inhibit the increase in pH value of butterfish after thawing (Cui *et al.*, 2018), while Zhu *et al.* (2019) found that high humidity had no significant effect on the pH value of thawed pork samples, which is different from the results of this experiment. The reason for this difference may be related to the different types of samples.

#### Effects of the thawing method on lipid oxidation of swimming crab

TBARS is an important index to measure the degree of lipid oxidation, which is often marked by MDA, the peroxidation product of polyunsaturated fatty acids (Crowe *et al.*, 2012; Yu *et al.*, 2015). As shown in Figure 1C, different degrees of lipid oxidation occurred in all groups of swimming crabs after thawing treatment, which could be due to the destruction of muscle tissue cells during the freeze–thaw process. This leads to the inactivation of important antioxidant enzymes and the release of pro-oxidants such as Fe<sup>2+</sup>, thereby accelerating the oxidation of fats (Benjakul and Bauer, 2001). Among these groups, the natural air thawing group had a higher thawing temperature and longer thawing time, resulting in a higher degree of oxidation. The TBARS value in this group (0.26 mg MDA/kg) was significantly higher than those in the other treatment groups ( $P<0.05$ ). However, at the same temperature, the TBARS value in the low-temperature high-humidity thawing group (LT2-4) was significantly lower (68.72 per cent lower) than that of the refrigerator thawing (RT) group ( $P<0.05$ ). The TBARS value of the LT-1-1 group reached that of fresh crabs. This result indicated that high humidity could slow the lipid oxidation of swimming crabs during thawing, which was

mainly due to the high humidity accelerating the thawing and isolating oxygen, thus reducing the occurrence of fat oxidation (Cui *et al.*, 2018).

#### Effects of the thawing method on the protein oxidation index of swimming crab

Carbonylation is an important sign that proteins have been attacked and oxidized by free radicals (Estévez, 2011), and carbonyl content is a common index to reflect the degree of protein oxidation (Oliveira *et al.*, 2017). The effect of different thawing methods on carbonyl content is shown in Figure 2A. After thawing, except for in the LT2-4 group, the carbonyl content of the swimming crabs in each group was significantly higher than that of fresh crabs ( $P<0.05$ ), indicating that obvious oxidative deterioration of protein occurred during thawing. This result was due to the formation of ice crystals that cause muscle cells to breakdown and release oxidase, which in turn catalyzes the oxidation reaction (Xia *et al.*, 2012). The carbonyl content of the natural air thawing group was the highest (5.63 nmol/mg prot). This result was mainly because the relatively high thawing temperature and long thawing time were beneficial for the oxidation reaction, leading to the accumulation of additional carbonyl groups. There was no significant difference in carbonyl content among the water immersion, refrigeration, LT-1-1, LT5-7 and LT8-10 groups ( $P>0.05$ ). The carbonyl content of the LT2-4 group was the lowest, showing a 31.40 per cent decrease compared with that of the refrigeration group in the same temperature range and showing a level close to the fresh value, indicating that high humidity could inhibit the oxidative deterioration of protein amino acid residues. Li *et al.* (2014a) also found that high humidity could significantly inhibit protein oxidation during beef thawing at low temperature and high humidity, and the carbonyl content during the whole thawing process and even 12 hours after thawing was significantly lower than that after traditional refrigerator thawing.

#### Effects of the thawing methods on the T-SH content of myofibrillar protein in swimming crabs

The sulfhydryl group is the most active functional group in the protein structure and is easily oxidized to form disulfide bonds during frozen storage or thawing, which leads to a decrease in sulfhydryl content (Kong *et al.*, 2013). As shown in Figure 2B, after the traditional thawing methods—namely, water immersion, natural air and refrigerator thawing—the protein oxidation had readily occurred, and the sulfhydryl content decreased by 34.12 per cent, 15.84 per

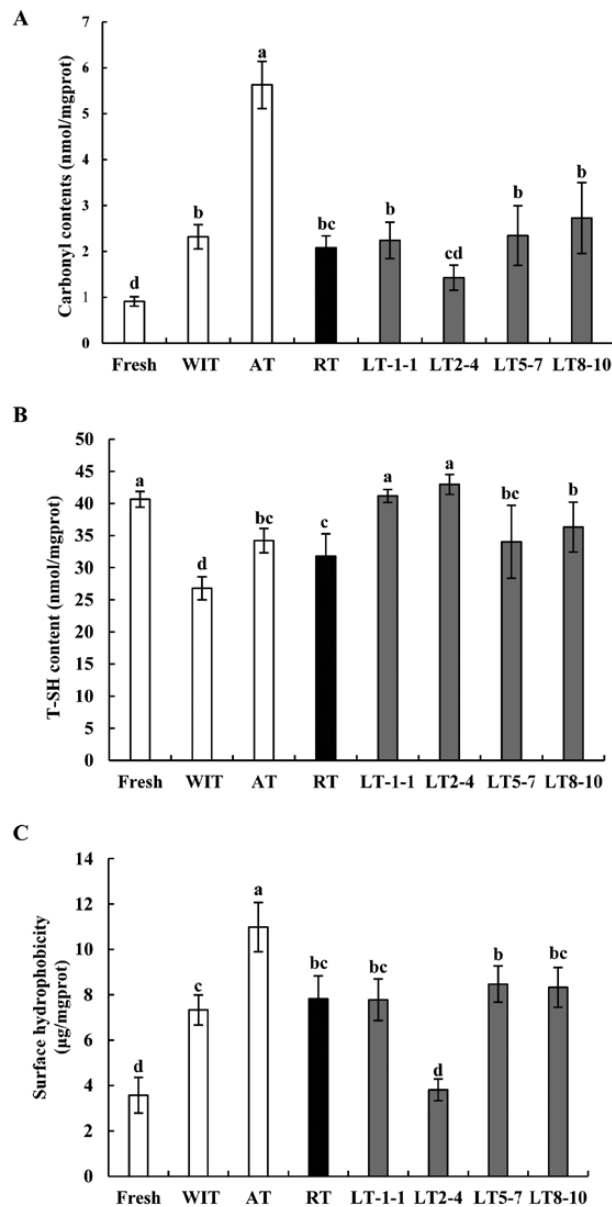

**Figure 2.** Effects of thawing methods on carbonyl content (A), T-SH content (B) and surface hydrophobicity (C) of myofibrillar protein in *Portunus trituberculatus*. Values followed by different Superscripts indicate significant differences ( $P < 0.05$ ). AT, air thawing; LT, low-temperature combined with high-humidity thawing; RT, refrigerator thawing; T-SH, total sulfhydryl; WIT, represents water immersion thawing.

cent and 21.79 per cent, respectively, compared with that of the fresh control group ( $P < 0.05$ ). After thawing at a low temperature in the range of  $-1$  °C to  $4$  °C under high humidity, the sulfhydryl content increased by 53.74–60.43 per cent ( $P < 0.05$ ) compared with that of water immersion thawing, 20.34–25.57 per cent ( $P < 0.05$ ) compared with that of natural air thawing, and 29.49–35.13 per cent ( $P < 0.05$ ) compared with that of refrigerator thawing, and there was no significant difference compared with the fresh value ( $P > 0.05$ ). The degree of protein oxidation was lower in this low-temperature, high-humidity group than in the other groups. This result is consistent with the findings in the study of low-temperature high-humidity thawing of butterfish (Cui et al., 2018) and beef (Li et al., 2014a), indicating that compared with traditional thawing methods,

low-temperature high-humidity thawing can effectively inhibit the conformational changes of proteins and reduce sulfhydryl exposure and oxidation, which may be closely related to a lower thawing temperature, shorter thawing time and oxygen isolation from the water film. However, under the conditions of high temperature ( $5$ – $10$  °C) and low temperature and high humidity, the sulfhydryl content decreased obviously, which may be due to the relatively high thawing temperature, acceleration of biochemical reactions, enzymatic activity and microbial reproduction, which led to changes in protein conformation and sulfhydryl oxidation.

#### Effects of the thawing methods on the surface hydrophobicity of myofibrillar protein in from swimming crabs

Surface hydrophobicity is a sensitive index that can be used to determine the changes in the fine structure of proteins and reflects the relative content of hydrophobic amino acids on the protein surface. This parameter is closely related to physicochemical and functional properties, such as water retention of the protein (Chelh et al., 2006; Kong et al., 2013; Zhang et al., 2015). In this experiment, the amount of bromophenol blue that bound was used to reflect the surface hydrophobicity. As shown in Figure 2C, the surface hydrophobicity of all treatment groups increased significantly compared with that of fresh swimming crabs, except for the LT2–4 group and the surface hydrophobicity of natural air thawing was the highest. This is because the protein is oxidized and unfolds during thawing, the molecular conformation changes, the peptide chain breaks or the structure extends, and the hydrophobic groups inside the molecule are exposed, which leads to an increase in surface hydrophobicity (Kong et al., 2013; Jommark et al., 2018; Li et al., 2019). There was no significant difference in the surface hydrophobicity values among the water immersion, refrigerator, LT–1–1, LT5–7 and LT8–10 groups. Notably, the increase in surface hydrophobicity of the LT2–4 group was the smallest and was significantly lower than that of the other treatment groups and close to the fresh value. This result was basically consistent with the change in carbonyl content results.

According to the above protein oxidation indexes, the thawing method with a low temperature ranging from  $2$  °C to  $4$  °C and high humidity was the best among the tested conditions, at which the degree of protein oxidation was the lowest and the crab quality was better after thawing. The thawing method of low temperature at  $-1$  °C to  $1$  °C and high humidity was the second best, but its long thawing time affected thawing efficiency. The protein oxidation degree after thawing at low temperature in the range of  $5$ – $10$  °C under high humidity was similar to that of refrigerator thawing, while the protein oxidation deterioration after water immersion thawing and natural air thawing was more serious, which was related to the higher thawing temperature.

#### Effects of the thawing method on the $\text{Ca}^{2+}$ -ATPase activity of swimming crabs

$\text{Ca}^{2+}$ -ATPase activity reflects the structural integrity of the myosin head, and its activity is a common index to measure the degree of protein denaturation (Benjakul et al., 1997, 2003). The effects of the different thawing methods on  $\text{Ca}^{2+}$ -ATPase activity are shown in Figure 3. After thawing, the loss of  $\text{Ca}^{2+}$ -ATPase activity in swimming crabs was relatively high ( $P < 0.05$ ). The  $\text{Ca}^{2+}$ -ATPase activity in the water immersion, natural air, refrigerator, LT–1–1, LT2–4, LT5–7 and LT8–10 samples decreased by 54.00 per cent, 38.08 per cent, 17.60 per cent, 34.10 per cent, 12.61

per cent, 29.85 per cent and 41.55 per cent, respectively, compared to that of the control group. This protein was severely denatured in these experimental groups. After thawing at low temperature at 2–4 °C and high humidity (sample LT2–4), the Ca<sup>2+</sup>-ATPase activity was the highest and the degree of protein denaturation was relatively low, so this condition was considered a suitable thawing method for swimming crabs. As reported, a decrease in Ca<sup>2+</sup>-ATPase activity after thawing may be attributed to sulfhydryl oxidation, myofibrillar proteolysis, mechanical action of ice crystals, etc. (Jiang *et al.*, 1988; Benjakul and Bauer, 2020). Among the different thawing methods, the LT method helped to reduce sulfhydryl oxidation and myofibrillar proteolysis, as mentioned above, involving comprehensive effects from low temperature, shortened thawing time and oxygen isolation.

### Correlation analysis of the quality indexes

The correlation among the quality indexes of the swimming crabs after thawing is shown in Table 2. There was a significant negative correlation between the pH and drip loss of thawing and centrifugation. There was a significant positive correlation between the TBARS value and the drip loss of thawing and centrifugation. The carbonyl group content and surface hydrophobicity were positively correlated with the drip loss due to thawing, cooking and centrifugation. The activities of T-SH and Ca<sup>2+</sup>-ATPase were significantly negatively correlated with the drip loss of thawing, cooking and centrifugation. These results showed that lipid oxidation and protein oxidation

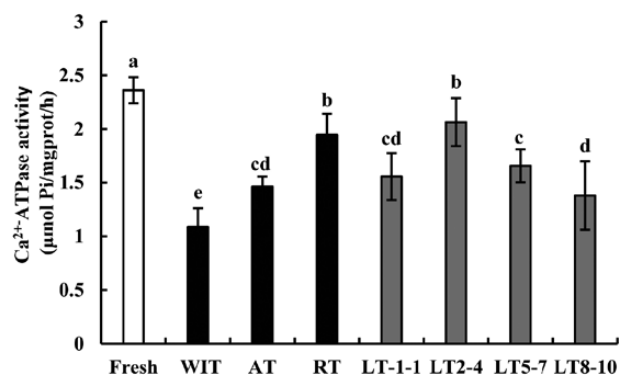

**Figure 3.** Effects of thawing methods on the Ca<sup>2+</sup>-ATPase activity of *Portunus trituberculatus*. Values followed by different Superscripts indicate significant differences ( $P<0.05$ ). AT, air thawing; LT, low-temperature combined with high-humidity thawing; RT, refrigerator thawing; WIT, represents water immersion thawing.

**Table 2.** Correlation analysis of various quality parameters for thawed *Portunus trituberculatus*

| Quality parameter                 | Thawing loss | Cooking loss | Centrifugal loss | pH       | TBARS    | Carbonyl content | T-SH     | Surface hydrophobicity | Ca <sup>2+</sup> -ATPase activity |
|-----------------------------------|--------------|--------------|------------------|----------|----------|------------------|----------|------------------------|-----------------------------------|
| Thawing loss                      | 1.000        |              |                  |          |          |                  |          |                        |                                   |
| Cooking loss                      | 0.564**      | 1.000        |                  |          |          |                  |          |                        |                                   |
| Centrifugal loss                  | 0.770**      | 0.552**      | 1.000            |          |          |                  |          |                        |                                   |
| pH                                | -0.697**     | -0.167       | -0.368*          | 1.000    |          |                  |          |                        |                                   |
| TBARS                             | 0.746**      | 0.336        | 0.514**          | -0.791** | 1.000    |                  |          |                        |                                   |
| carbonyl content                  | 0.840**      | 0.315*       | 0.615**          | -0.851** | 0.776**  | 1.000            |          |                        |                                   |
| T-SH                              | -0.412**     | -0.565**     | -0.465**         | 0.260    | -0.572** | -0.307*          | 1.000    |                        |                                   |
| Surface hydrophobicity            | 0.759**      | 0.360*       | 0.609**          | -0.743** | 0.763**  | 0.782**          | -0.411** | 1.000                  |                                   |
| Ca <sup>2+</sup> -ATPase activity | -0.483**     | -0.686**     | -0.441**         | 0.016    | -0.416*  | -0.108           | 0.459**  | -0.395**               | 1.000                             |

\*Significant correlation ( $P<0.05$ ); \*\*extremely significant correlation ( $P<0.01$ ). TBARS, thiobarbituric acid reacting substances; T-SH, total sulfhydryl.

and denaturation had obvious effects on the water retention of crab meat. Lower levels of TBARS, carbonyl groups, and surface hydrophobicity and higher of T-SH and Ca<sup>2+</sup>-ATPase activities (Figures 1C, 2–3) were important for the best water retention observed in the LT2–4 group (Table 1).

Ca<sup>2+</sup>-ATPase activity was negatively correlated with the water retention index, TBARS value and surface hydrophobicity but positively correlated with T-SH. This shows that the decrease in muscle water retention capacity, thiol oxidation and exposure of hydrophobic residues are important reasons for the inactivation of Ca<sup>2+</sup>-ATPase. This conclusion is consistent with the literature (Reza *et al.*, 2009; Cao *et al.*, 2015; Zhang *et al.*, 2018). Under the low-temperature and high-humidity thawing conditions at 2–4 °C, the loss of Ca<sup>2+</sup>-ATPase activity was relatively low, which may be closely related to the relatively high water retention (Table 1) and sulfhydryl content (Figure 2B) and low TBARS and surface hydrophobicity values (Figure 2C) observed in this group.

### Conclusion

Different thawing methods have different effects on the quality of swimming crabs after thawing. The thawing time of the crabs after water immersion was the shortest, followed by thawing at low temperature and high humidity. Compared with the traditional air thawing method, high humidity significantly shortened the thawing time of swimming crabs and effectively increased the thawing rate. The swimming crabs thawed under low-temperature (2–4 °C and 5–7 °C) and high-humidity conditions had better water retention than those samples that under other conditions. The drip loss of the thawed juices in these two groups was significantly lower than those of the water immersion and natural air thawing groups, while that after centrifugal thawing was significantly lower than all three traditional thawing conditions. Thawing at a low temperature and high humidity helped to maintain the freshness of swimming crabs and slow lipid oxidation. After high-humidity thawing at -1–1 °C and 2–4 °C, the pH and TBARS values were significantly lower than those after traditional thawing and close to the value of the fresh sample. The freshness and lipid oxidation degree of high-humidity thawing at 5–7 °C and 8–10 °C were similar to those of refrigerator thawing. Thawing at a low temperature and high humidity can reduce the oxidation and denaturation of myofibrillar protein. After high-humidity thawing at 2–4 °C, the degree of protein oxidation was significantly lower than that of traditional thawing, and there was no significant difference in the carbonyl and T-SH contents and surface hydrophobicity between thawed swimming crabs and fresh

swimming crab, while the Ca<sup>2+</sup>-ATPase activity was significantly higher than that after water immersion and natural air thawing. There was no significant difference in the degree of protein oxidation between the other high-humidity thawing groups and refrigerator thawing groups.

The time required for water immersion thawing was short, but the quality was seriously reduced. The cost of air thawing is low, but it is time-consuming and results in poor-quality thawed products. Although the quality of crab meat is good after refrigerator thawing, this method takes too long and affects the thawing efficiency. Generally, thawing at a low temperature with high humidity gives an efficient thawing rate and can better maintain the muscle quality and myofibrillar protein functional properties of swimming crabs. Among the groups, low-temperature high-humidity thawing at 2–4 °C was the best and the most suitable thawing method for swimming crabs. The quality of the crab meat subjected to the other low-temperature, high-humidity thawing conditions was similar to that of meat subjected to refrigerator thawing, and the thawing rate was significantly improved. However, the effective mechanism of low-temperature high-humidity thawing on swimming crabs and other aquatic products needs to be further studied.

## Author Contributions

Jiangang Ling and Xiaoting Xuan contributed to the conception of the study, performed the data analyses and wrote the manuscript; Zihan Xu and Yan Cui performed the experiment and helped perform the analysis with constructive discussions; Tian Ding and Xudong Lin contributed significantly to analysis and manuscript preparation; Donghong Liu contributed to the conception of the study.

## Funding

This research was funded by the National Key Research and Development Program of China (No.2016YFD0400304) and the Major Science and Technology Projects of Agricultural of Ningbo, China (No.2016C11016).

## Conflict of Interest

The authors declare no conflict of interest.

## References

- Benjakul, S., Bauer, F. (2000). Physicochemical and enzymatic changes of cod muscle proteins subjected to different freeze–thaw cycles. *Journal of the Science of Food and Agriculture*, 80(8): 1143–1150.
- Benjakul, S., Bauer, F. (2001). Biochemical and physicochemical changes in catfish (*Silurus glanis Linne*) muscle as influenced by different freeze–thaw cycles. *Food Chemistry*, 72(3): 207–217.
- Benjakul, S., Seymour, T. A., Morrissey, M. T., et al. (1997). Physicochemical changes in Pacific whiting muscle proteins during iced storage. *Journal of Food Science*, 62(4): 729–733.
- Benjakul, S., Visessanguan, W., Thongkaew, C., et al. (2003). Comparative study on physicochemical changes of muscle proteins from some tropical fish during frozen storage. *Food Research International*, 36(8): 787–795.
- Cao, L. W., Su, S. S., Regenstein, J. M., et al. (2015). Ca<sup>2+</sup>-induced conformational changes of myosin from silver carp (*Hypophthalmichthys molitrix*) in gelatin. *Food Biophysics*, 10(4): 447–455.
- Chandirasekaran, V., Thulasi, G. (2013). Effect of different thawing methods on physicochemical characteristics of frozen buffalo meat. *Journal of Food Technology*, 8(6): 239–242.
- Chelh, I., Gatellier, P., Santé-Lhoutellier, V. (2006). Technical note: A simplified procedure for myofibril hydrophobicity determination. *Meat Science*, 74(4): 681–683.
- Crowe, K. M., Skonberg, D., Bushway, A., et al. (2012). Application of ozone sprays as a strategy to improve the microbial safety and quality of salmon fillets. *Food Control*, 25(2): 464–468.
- Cui, Y., Lin, X. D., Kang, M. L., et al. (2018). Low temperature combined with high-humidity thawing reduced the physicochemical quality deterioration of *Pampus argenteus*. *Modern Food Science and Technology*, 34(8): 81–89. (In Chinese)
- Cui, Y., Xuan, X. T., Lin, X. D., et al. (2019). Effect of high hydrostatic pressure combined with freezing treatment on shucking and physicochemical properties of myofibrillar protein of *Penaeus vannamei*. *Modern Food Science and Technology*, 35(2): 32–39. (in Chinese)
- Di, J., Jin, Y. (2015). Effect of different thawing methods on the quality of beef. *The Food Industry*, 36(1): 174–177. (in Chinese)
- Ellman, G. L. (1959). Tissue sulfhydryl groups. *Archives of Biochemistry and Biophysics*, 82(1): 70–77.
- Ersoy, B., Aksan, E., Özeren, A. (2008). The effect of thawing methods on the quality of eels (*Anguilla anguilla*). *Food Chemistry*, 111(2): 377–380.
- Estévez, M. (2011). Protein carbonyls in meat systems: A review. *Meat Science*, 89(3): 259–279.
- Huang, H., Sun, W. Q., Xiong, G. Q., et al. (2020). Effects of HVEF treatment on microbial communities and physicochemical properties of catfish fillets during chilled storage. *LWT—Food Science and Technology*, 131: 109667.
- Jiang, S. T., Hwang, D. C., Chen, C. S. (1988). Effect of storage temperatures on the formation of disulfides and denaturation of milkfish myosin (*Chanos chanos*). *Journal of Food Science*, 53(5): 1333–1335.
- Jommark, N., Runglerdkriangkrai, J., Konno, K., et al. (2018). Effect of cryoprotectants on suppression of protein structure deterioration induced by freeze–thaw cycle in Pacific white shrimp. *Journal of Aquatic Food Product Technology*, 27(1): 91–106.
- Kong, B. H., Guo, Y. Y., Xia, X. F., et al. (2013). Cryoprotectants reduce protein oxidation and structure deterioration induced by freeze–thaw cycles in common carp (*Cyprinus carpio*) surimi. *Food Biophysics*, 8(2): 104–111.
- Leygonie, C., Britz, T. J., Hoffman, L. C. (2012). Meat quality comparison between fresh and frozen/thawed ostrich *M. iliofibularis*. *Meat Science*, 91(3): 364–368.
- Li, Y., Jia, W., Zhang, C. H., et al. (2014a). Fluctuated low temperature combined with high-humidity thawing to reduce physicochemical quality deterioration of beef. *Food and Bioprocess Technology*, 7(12): 3370–3380.
- Li, Y., Li, X., Jia, W., et al. (2014b). Development and application of low-variable temperature and high humidity thawing garage. *Transactions of the Chinese Society of Agricultural Engineering*, 30(2): 244–251. (In Chinese).
- Li, F. F., Wang, B., Liu, Q., et al. (2019). Changes in myofibrillar protein gel quality of porcine longissimus muscle induced by its structural modification under different thawing methods. *Meat Science*, 147: 108–115.
- Lin, X. P., Ji, Z., Shu, Y. Z., et al. (2015). Cryoprotective effects of mackerel hydrolysate addition on the hairtail surimi during frozen storage. *Acta Agriculturae Nucleatae Sinica*, 29(5): 940–945. (In Chinese)
- Liu, B., Liu, Z. Q., Li, D. Y., et al. (2020). Action of endogenous proteases on texture deterioration of the bay scallop (*Argopecten irradians*) adductor muscle during cold storage and its mechanism. *Food Chemistry*, 323: 126790.
- Lorentzen, G., Hustad, A., Lian, F., et al. (2020). Effect of freezing methods, frozen storage time, and thawing methods on the quality of mildly cooked snow crab (*Chionoecetes opilio*) clusters. *LWT—Food Science and Technology*, 123: 109103.
- Manios, S. G., Skandamis, P. N. (2015). Effect of frozen storage, different thawing methods and cooking processes on the survival of *Salmonella* spp. and *Escherichia coli* O157:H7 in commercially shaped beef patties. *Meat Science*, 101: 25–32.



- Mousakhani-Ganjeh, A., Hamdami, N., Soltanizadeh, N. (2016). Thawing of frozen tuna fish (*Thunnus albacares*) using still air method combined with a high voltage electrostatic field. *Journal of Food Engineering*, 169: 149–154.
- Oliveira, F. A. D., Neto, O. C., Santos, L. M. R. D., et al. (2017). Effect of high pressure on fish meat quality—A review. *Trends in Food Science and Technology*, 66: 1–19.
- Oliver, C. N., Ahn, B. W., Moerman, E. J., et al. (1987). Age-related changes in oxidized proteins. *The Journal of Biological Chemistry*, 262(12): 5488–5491.
- Peng, Z. Y., Zhu, M. M., Zhang, H. M., et al. (2019). Improved quality characteristics of pork thawed at low-temperature and high-humidity. *Food and Fermentation Industries*, 8: 79–85. (In Chinese)
- Reza, M. S., Bapary, M. A. J., Ahasan, C. T., et al. (2009). Shelf life of several marine fish species of Bangladesh during ice storage. *International Journal of Food Science and Technology*, 44(8): 1485–1494.
- Richa, R., Shahi, N., Singh, A., et al. (2017). Ohmic heating technology and its application in meaty food: A review. *Advances in Research*, 10(4): 1–10.
- Ryu, Y. C., Choi, Y. M., Kim, B. C. (2005). Variations in metabolite contents and protein denaturation of the longissimus dorsi muscle in various porcine quality classifications and metabolic rates. *Meat Science*, 71(3): 522–529.
- Thanonkaew, A., Benjakul, S., Visessanguan, W., et al. (2006). The effect of metal ions on lipid oxidation, colour and physicochemical properties of cuttlefish (*Sepia pharaonis*) subjected to multiple freeze–thaw cycles. *Food Chemistry*, 95(4): 591–599.
- Truong, B. Q., Buckow, R., Stathopoulos, C. E., et al. (2015). Advances in high-pressure processing of fish muscles. *Food Engineering Reviews*, 7(2): 109–129.
- Wang, Z. Y., Yang, W. G., Zhou, G., et al. (2017). Shelling of *Solenocera melantho* using ultra high pressure and its effect on the quality of muscle. *Food Science*, 38(7): 43–48. (In Chinese)
- Xia, X. F., Kong, B. H., Liu, J., et al. (2012). Influence of different thawing methods on physicochemical changes and protein oxidation of porcine longissimus muscle. *LWT—Food Science and Technology*, 46(1): 280–286.
- Xia, X. F., Kong, B. H., Xiong, Y. L., et al. (2010). Decreased gelling and emulsifying properties of myofibrillar protein from repeatedly frozen–thawed porcine longissimus muscle are due to protein denaturation and susceptibility to aggregation. *Meat Science*, 85(3): 481–486.
- Xiong, G. Q., Cheng, W., Ye, L. X., et al. (2009). Effects of konjac glucomannan on physicochemical properties of myofibrillar protein and surimi gels from grass carp (*Ctenopharyngodon idella*). *Food Chemistry*, 116(2): 413–418.
- Yu, B., Sun, J. X., Yu, L. H., et al. (2015). Effects of different freezing and thawing processes on chicken quality. *Meat Research*, 29(1): 6–9. (In Chinese)
- Zhang, X., Gao, T., Song, L., et al. (2017). Effects of different thawing methods on the quality of chicken breast. *International Journal of Food Science and Technology*, 52(9): 2097–2105.
- Zhang, B., Hao, G. J., Cao, H. J., et al. (2018). The cryoprotectant effect of xylooligosaccharides on denaturation of peeled shrimp (*Litopenaeus vannamei*) protein during frozen storage. *Food Hydrocolloids*, 77: 228–237.
- Zhang, C. H., Li, X., Li, Y., et al. (2013). Low-variable temperature and high humidity thawing improves lamb quality. *Transactions of the Chinese Society of Agricultural Engineering*, 29(6): 267–273. (In Chinese)
- Zhang, B., Ma, L. K., Deng, S. G., et al. (2015). Shelf-life of Pacific white shrimp (*Litopenaeus vannamei*) as affected by weakly acidic electrolyzed water ice-glazing and modified atmosphere packaging. *Food Control*, 51: 114–121.
- Zhu, W. H., Huan, H. Z., Bu, Y., et al. (2017). Effect of different thawing methods on water holding capacity and protein oxidation in *Dosidicus gigas*. *Food Science*, 38(11): 6–11. (In Chinese)
- Zhu, M. M., Peng, Z. Y., Lu, S., et al. (2019). Effect of high-humidity thawing under different temperatures on physicochemical characteristics and protein properties of frozen pork. *Food Science*, 40(17): 127–133. (In Chinese)
